# Supplementary material for: Real-time intraoperative glioma diagnosis using fluorescence imaging and deep convolutional neural networks
Source: Springer Nature journal article supplement (doi:10.1007/s00259-021-05326-y), 2021-04-27
Supplement: MOESM1 [file 19110070]

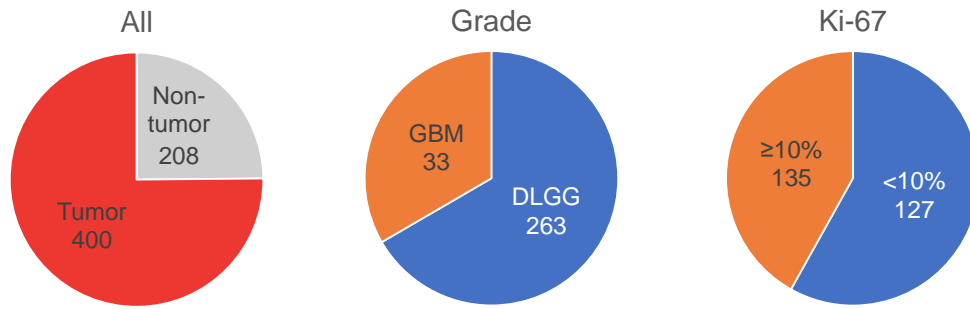

**Supplementary Fig. S1 | Data distribution of test sets.** Number of specimens per class of the test sets, with pathological examination results as the gold standard, for the task of classification of tumor versus non-tumor, DLGG versus GBM and Ki-67 level <10% versus  $\geq 10\%$ , correspondingly. Every test set was randomly sampled from the whole dataset while approximately keeping the class ratio as the original.

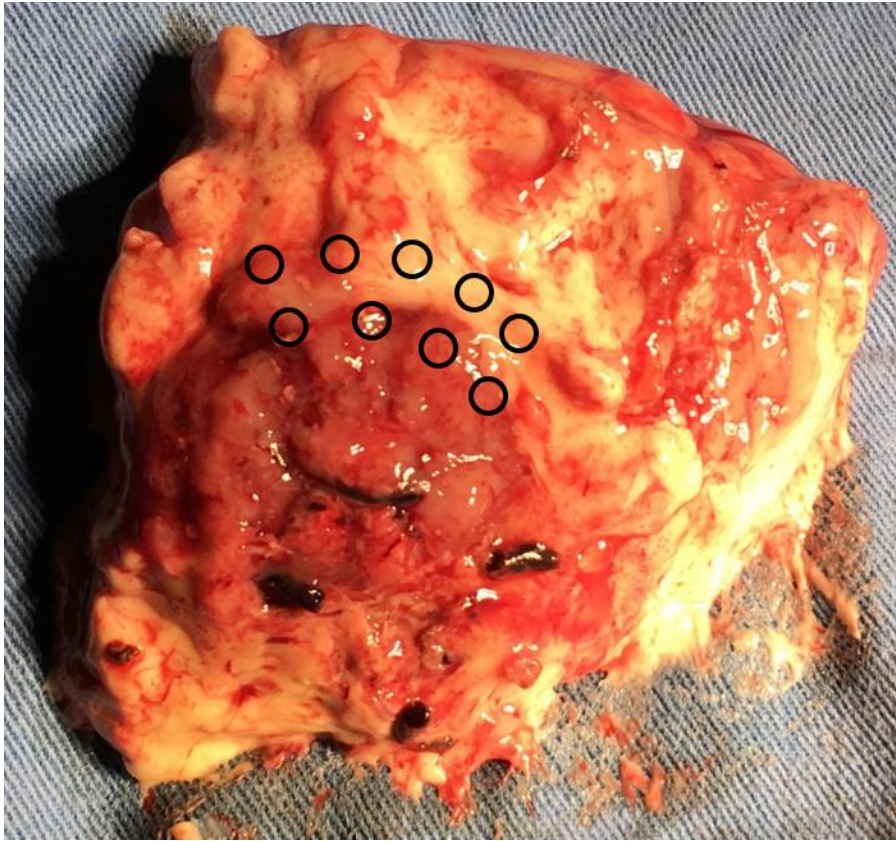

**Supplementary Fig. S2 | Example for one of the 8 parts on tumor margin where surgical specimens were obtained from.** The tumor surface was uniformly divided into 8 parts from the view of cross-section, and around 10 samples were taken from each part of the tumor-margin areas, resulting in a total of around 80 samples per patient.

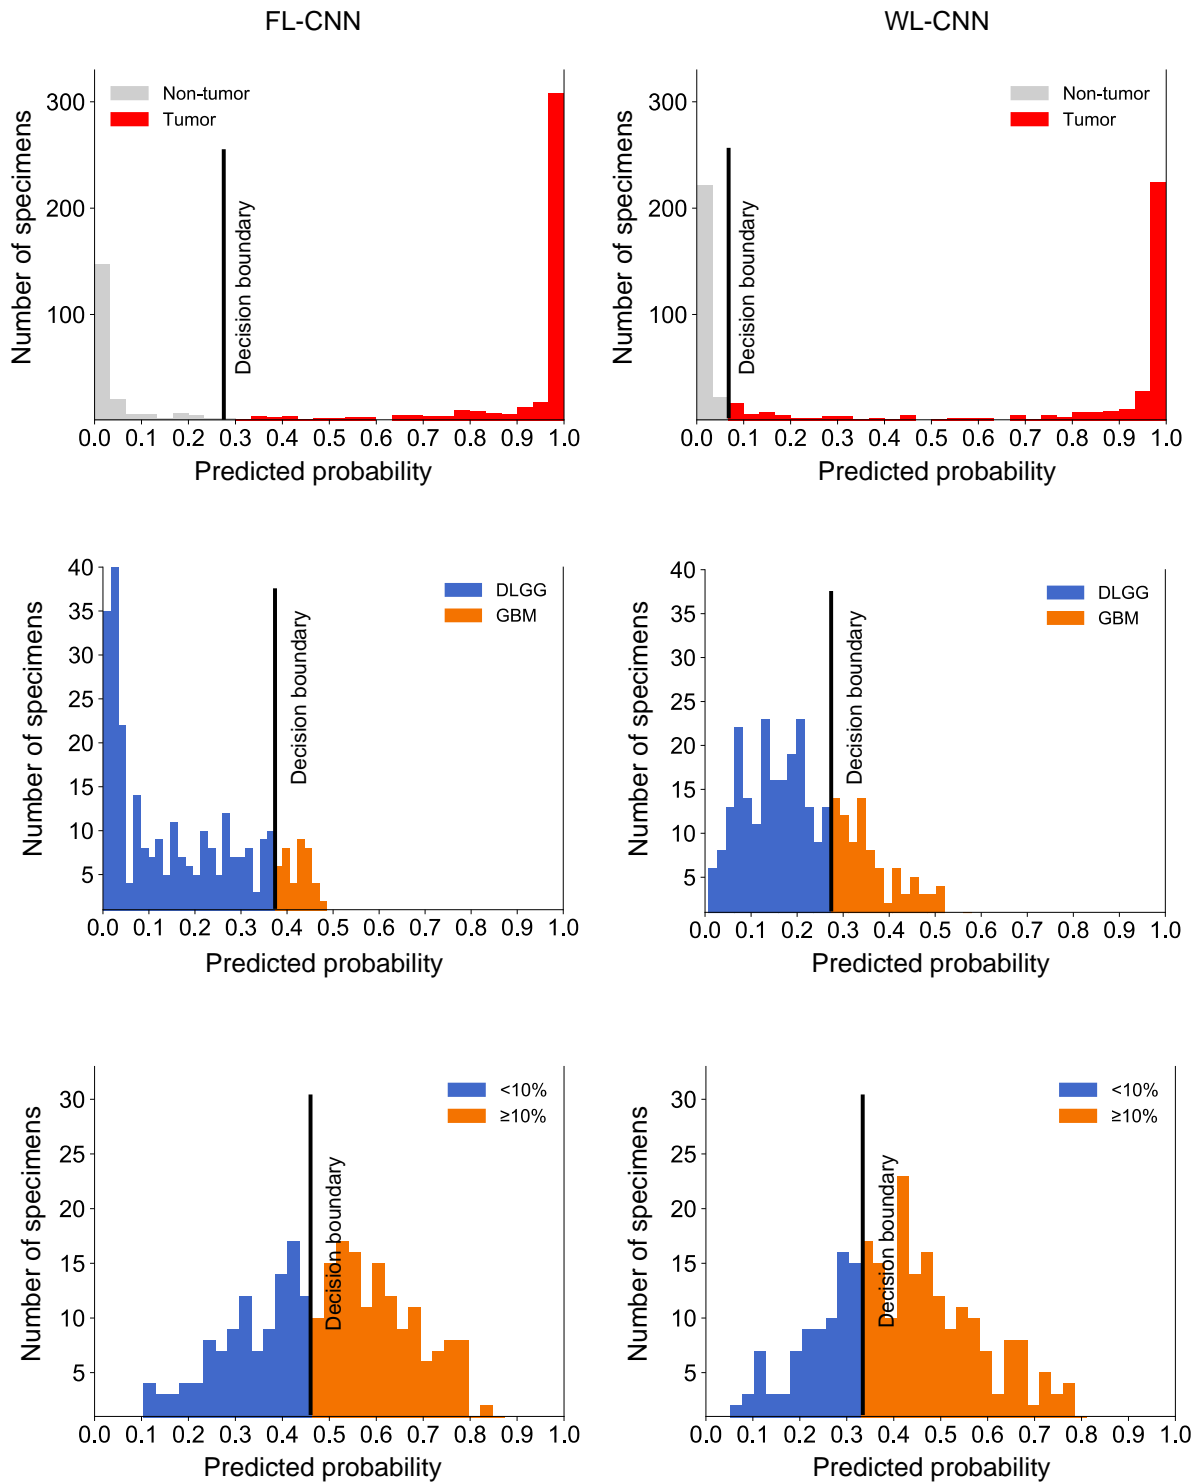

**Supplementary Fig. S3 | Predicted probability distribution of CNNs on the classification of tumor versus non-tumor, and prediction of the grade and Ki-67 level of tumor specimens.** Histogram plot of probabilities of the positive class (tumor, GBM,  $\geq 10\%$ ) predicted by CNNs (FL-CNN and WL-CNN). Decision boundary is used to transform predicted probability into decision.

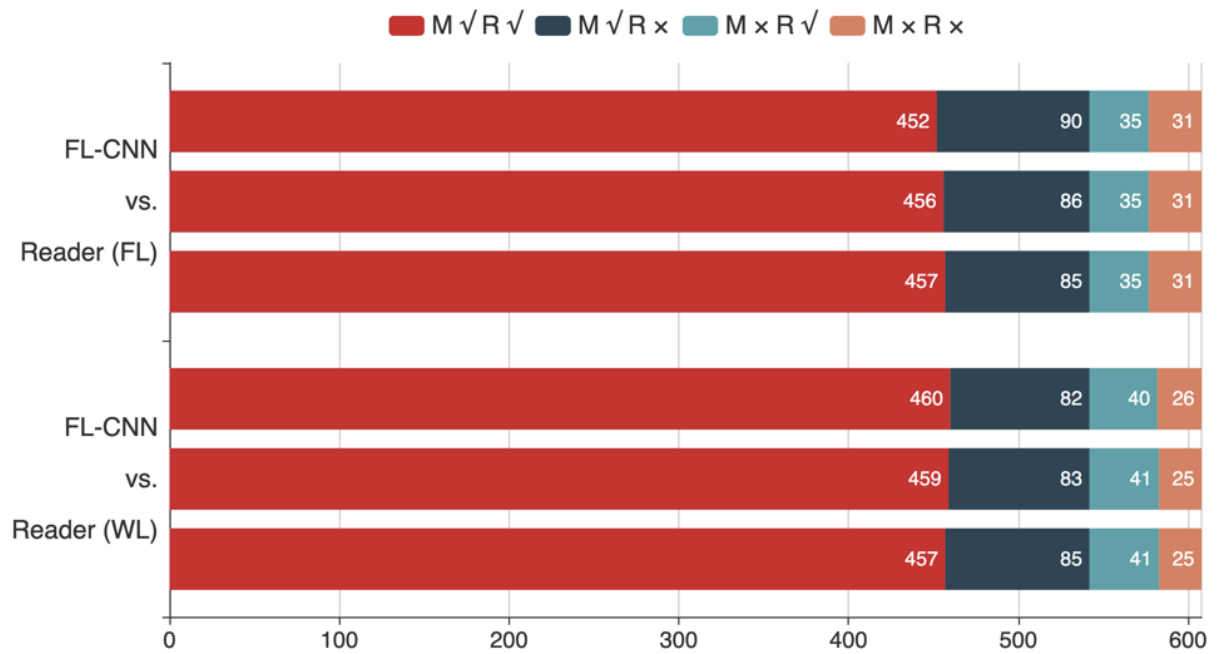

**Supplementary Fig. S4 | Error analysis.** Number of specimens classified right or wrong by FL-CNN and neurosurgeons. M represents the model (FL-CNN) and R represents neurosurgeons (readers). For example,  $M\sqrt{R}\sqrt{\phantom{x}}$  represents the number of specimens that both FL-CNN and neurosurgeons classified correctly;  $M\sqrt{R}\times$  represents the number of specimens that FL-CNN classified correctly but neurosurgeons classified wrong, which means how many errors made by neurosurgeons were corrected by FL-CNN.  $M\times R\sqrt{\phantom{x}}$  and  $M\times R\times$  follow the same convention. Three horizontal bars represent the comparison between three individual neurosurgeons and FL-CNN. All results were obtained on the test set (N=608).

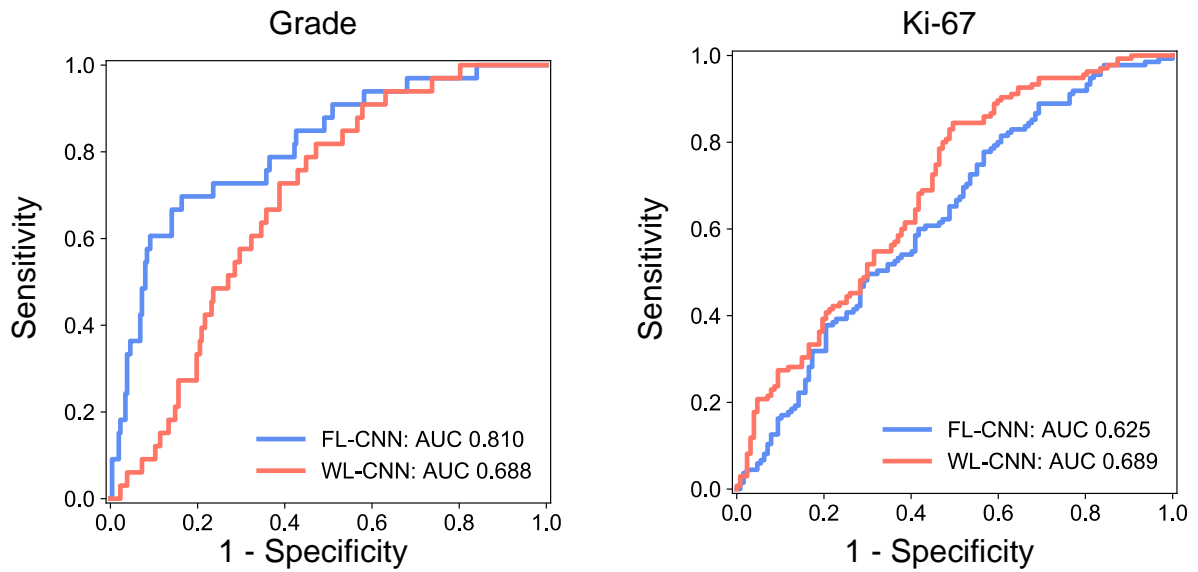

**Supplementary Fig. S5 | ROC Analysis for the task of grade and Ki-67.** Receiver operating characteristic (ROC) curves calculated for the CNNs on FL and WL images for the classification of DLGG versus GBM for grade, and <10% versus  $\geq 10\%$  for Ki-67 level. The blue lines represent the ROC achieved by the FL-CNN on FL images and red lines represent the ROC achieved by the WL-CNN on WL images.

**Supplementary Table S1. Diagnostic performance of fluorescence imaging methods for brain tumors.**

| <b>Reference</b>                                          | <b>Method</b> | <b>Sensitivity</b> | <b>Specificity</b> | <b>PPV</b> | <b>NPV</b> | <b>Patient Size</b> |
|-----------------------------------------------------------|---------------|--------------------|--------------------|------------|------------|---------------------|
| John Y K L <i>et al.</i><br><i>Neurosurgery.</i><br>2016  | ICG NIR-I     | 0.98               | 0.45               | 0.82       | 0.90       | 71                  |
| Stummer W <i>et al.</i><br><i>J Neurosurg.</i><br>2011    | 5-XLA         | 0.706              | 0.811              | 0.978      | 0.188      | 176                 |
| Stummer W <i>et al.</i><br><i>Neurosurgery.</i><br>2014   | 5-XLA         | 0.677              | 0.794              | 0.962      | 0.241      | 33                  |
| Acerbi F <i>et al.</i><br><i>Clin Cancer Res.</i><br>2018 | Fluorescein   | 0.808              | 0.791              | 0.808      | 0.791      | 57                  |

**Supplementary Table S2. Inter-neurosurgeons and binary deep-learning method variability estimated with the Cohen's Kappa statistic, on the classification of tumor versus non-tumor for FL images.**

|                                         | Neurosurgery 1 | Neurosurgery 2 | Neurosurgery 3 | Consensus<br>between 3<br>neurosurgeons | FL-CNN |
|-----------------------------------------|----------------|----------------|----------------|-----------------------------------------|--------|
| Gold standard                           | 0.531          | 0.548          | 0.551          | 0.548                                   | 0.770  |
| Neurosurgery 1                          |                | 0.983          | 0.979          | 0.983                                   | 0.497  |
| Neurosurgery 2                          |                |                | 0.996          | 1.000                                   | 0.514  |
| Neurosurgery 3                          |                |                |                | 0.996                                   | 0.517  |
| Consensus<br>between 3<br>neurosurgeons |                |                |                |                                         | 0.514  |

**Supplementary Table S3. Inter-neurosurgeons and binary deep-learning method variability estimated with the Cohen's Kappa statistic, on the classification of tumor versus non-tumor for WL images.**

|                                         | Neurosurgery 1 | Neurosurgery 2 | Neurosurgery 3 | Consensus<br>between 3<br>neurosurgeons | WL-CNN |
|-----------------------------------------|----------------|----------------|----------------|-----------------------------------------|--------|
| Gold standard                           | 0.621          | 0.621          | 0.615          | 0.621                                   | 0.597  |
| Neurosurgery 1                          |                | 0.993          | 0.986          | 0.993                                   | 0.567  |
| Neurosurgery 2                          |                |                | 0.993          | 1.000                                   | 0.560  |
| Neurosurgery 3                          |                |                |                | 0.993                                   | 0.554  |
| Consensus<br>between 3<br>neurosurgeons |                |                |                |                                         | 0.560  |
